# Supplementary material
Source: publisher figshare collection journal article supplement (https://gsajournals.figshare.com/articles/dataset/_/6007709)
Supplement: Supplementary file 1 [file 2]

## Sheet: List of effective cell contacts
Supplementary Table 1. List of cell pairs between which an effective cell contact is called
Cell-Cell contact name	Contact mean value (pixel)	Normality test P-value*	Contact Time Point	Relative Contact Area (um2)
Eprp<->Eplp	3592.21	0.0398551	50.2418	0.211096
Ealp<->Earp	2521.15	0.0862137	42.1978	0.140417
Ealp<->Epla	2869.35	0.438979	41.978	0.155153
Epra<->Z2	1797.93	0.298222	38.2308	0.115892
Epla<->Z2	1985.48	0.339292	38.044	0.122014
Eala<->Eara	1863.54	0.799882	37.3626	0.105441
Epra<->Epla	1787.9	0.816452	35.8242	0.117631
Eprp<->ABarppppp	2330.27	0.000106889	35.3846	0.141411
ABarpappa<->ABarpapap	3302.74	0.00900191	34.4396	0.181464
Cpppp<->Cappp	2678.9	0.000433989	34.3626	0.163485
ABalaaaar<->ABaraaaaa	2497.13	0.438847	34.2418	0.149221
Cappp<->Capap	3174.11	1.21e-07	34.011	0.196995
ABplaaaap<->ABplaaapa	3040.44	0.0343642	33.956	0.167972
ABprapaap<->ABarppppa	2981.61	0.484839	33.9341	0.179963
ABarppaap<->ABarppapa	3743.4	0.382565	33.8242	0.215094
ABprappap<->ABprapppa	2842.78	0.435846	33.8022	0.162922
MSapaap<->MSapapa	2291.36	0.057555	33.7912	0.143603
Cpppp<->Cppap	2993.83	0.142809	33.6154	0.182765
ABalaapap<->ABpraaaaa	2416.87	2.02e-05	33.5165	0.145716
MSppapa<->MSppaap	2010.2	0.315455	33.3407	0.126753
ABalapapa<->ABalapaap	2219.27	0.10123	33.044	0.128618
Z2<->MSpappp	1921.65	0.900598	32.8571	0.129537
MSpappp<->Cppaa	2062.75	0.384181	32.8352	0.140075
ABprpaaap<->ABprpaapa	2663.36	0.388096	32.8352	0.146358
ABpraappa<->ABpraapap	2530.39	0.128915	32.8022	0.140783
ABplappap<->ABplapppa	2814.98	0.707916	32.7143	0.157891
Cpaap<->Cpapa	4184.22	0.283478	32.6813	0.214869
Caapp<->Cappp	3035.86	0.557232	32.6374	0.18552
Cpapp<->Cpppp	3697.72	0.603414	32.5385	0.209243
Cpapp<->Caapp	2615.98	0.000626849	32.5275	0.14812
ABarpppap<->ABarppppa	3708.5	0.039538	32.5165	0.211062
ABplpaaap<->ABplpaapa	2448.18	0.0831068	32.4396	0.134218
ABprpppaa<->ABprppapp	2527.42	0.236433	32.033	0.145563
Eprp<->Z2	1303.31	0.0887059	32.022	0.0991044
Eplp<->ABarppapp	1782.97	0.0574388	31.956	0.113511
ABalaaapp<->ABalaappa	2211.82	0.776299	31.9231	0.126511
ABplppapa<->ABplppaap	2891.77	0.0586587	31.7582	0.166452
ABplaappa<->ABplaapap	2407.69	0.870818	31.7253	0.132627
ABprppppp<->ABprpppap	2864.98	0.261048	31.6374	0.164736
ABarpappp<->ABarpppaa	3684.81	0.0189995	31.5824	0.205674
Eprp<->Cpppa	2042	0.087362	31.5604	0.136028
ABplpppaa<->ABplppapp	2417.2	0.908012	31.5275	0.140705
Eplp<->Z2	1272.79	0.534433	31.4945	0.0891974
ABprppapa<->ABprppaap	2843.26	0.777379	31.4945	0.164674
Z2<->Dpa	2993.58	0.978573	31.4286	0.151191
Cpppa<->ABprapppp	3088.82	0.253374	31.2088	0.190135
ABplaapaa<->ABplaaaaa	2248.35	0.811877	30.989	0.129888
ABprpappp<->ABprppppa	2818.91	0.790777	30.978	0.153286
ABplaaapp<->ABarppaaa	3753.02	0.0119034	30.9341	0.21116
ABplpappp<->ABplppppa	3042.01	0.0292343	30.8791	0.166344
ABplpppap<->ABplapppp	2423.78	0.541505	30.8681	0.142738
ABprppppa<->ABprpppaa	2455.3	0.976102	30.8462	0.137657
ABprpapap<->ABprpappa	2799.65	0.316199	30.8242	0.14978
ABprpppap<->ABprapppp	2715.39	0.348004	30.7363	0.160605
Eplp<->Caaap	2469.74	0.54951	30.6703	0.135815
ABplapppa<->ABplppapp	1769.05	0.158328	30.6484	0.109891
ABprpppap<->ABprapppa	1999.44	0.515384	30.5275	0.117281
ABarappaa<->ABarapppa	2530.1	0.0181366	30.3956	0.146673
ABplpppaa<->ABplppppa	2492.58	0.106502	30.3407	0.140481
ABalaappa<->ABalaapap	1784.37	0.420346	30.2967	0.110307
ABalppppa<->ABalpppap	2402.18	0.573116	30.0769	0.132388
MSppapp<->MSppppa	2074.6	0.527486	30	0.140445
ABalppapp<->ABplpapaa	3117.27	0.161509	29.8901	0.169886
ABprpaaaa<->ABarapppa	2226.44	0.0115959	29.6813	0.126743
ABprpapaa<->ABarappap	2206.72	0.351182	29.5824	0.127649
ABalapaaa<->ABalappaa	1795.68	0.19588	29.5714	0.11398
ABplpppap<->ABplppppp	2528.24	0.0293789	29.5055	0.148049
ABplapppp<->Cappa	3176.7	0.537663	29.5055	0.194441
ABplappaa<->ABplppapa	2202.48	0.289127	29.4066	0.129628
ABalaaapa<->ABalaaaar	2310.48	7.2e-09	29.3297	0.135428
ABplpppap<->ABplapppa	1817.74	0.962497	29.2198	0.109169
ABarapapa<->ABarapaap	2739.87	0.0410999	29.1209	0.148593
ABprpaapp<->ABpraappp	2328.9	0.499127	29.0879	0.127724
ABpraappp<->ABprapaap	2491.23	0.794631	28.9121	0.137671
ABaraappa<->ABarapaap	2162.24	0.796202	28.9011	0.12082
MSapapp<->MSapppa	1750	0.732369	28.8791	0.119031
ABalaappp<->ABpraaapa	2211.46	0.99184	28.8462	0.131452
ABaraappa<->ABaraapap	2338.28	0.0335757	28.7473	0.13253
ABaraapaa<->ABaraaaap	2063.29	0.571033	28.7143	0.116049
ABarapapa<->ABarappaa	2326.18	0.460261	28.6593	0.129275
ABalaaapa<->ABalappaa	1992.87	0.487777	28.6593	0.119066
ABplpappa<->ABplpapap	3361.97	0.773321	28.5934	0.17831
ABalpappa<->ABalpapap	3200.52	0.00134578	28.5714	0.169649
ABpraaapa<->ABpraaaap	2051.17	0.0433667	28.5604	0.120869
ABprapapa<->ABprappap	2878.37	0.0861041	28.5495	0.169553
ABalpppaa<->ABalppaaa	2184.25	0.480666	28.5275	0.13421
ABarpappp<->ABpraapap	2195.41	0.256494	28.4945	0.128435
ABplaappp<->ABplappaa	3346.47	0.494873	28.4286	0.179943
MSpapap<->MSpappa	2809.33	0.391405	28.2088	0.165946
ABpraappa<->ABprapaaa	1894.64	0.668576	28.1429	0.117917
ABplaapap<->ABplaaapa	2018.05	0.27782	28	0.121419
MSaapap<->MSaappa	2173.44	0.427123	27.956	0.133076
MSaaaap<->MSaaapa	2736.84	0.0131708	27.9231	0.155381
ABpraaapp<->ABpraapaa	2782.19	0.347113	27.9121	0.151348
ABprpaaaa<->ABpraaaap	2472.66	0.0816399	27.8022	0.140447
ABplapapp<->ABplappap	2423.36	0.886912	27.7802	0.133473
ABprapapp<->ABprappap	2588.86	0.0316465	27.7582	0.146711
Caaaa<->ABarppapp	4178.79	0.56689	27.7582	0.231237
Cpapa<->Caapa	2495	0.157954	27.5165	0.150428
ABalaaapp<->ABalappaa	1820.5	0.97928	27.4835	0.109066
Earp<->Epla	1473.75	0.082721	27.4286	0.0996265
ABprpaapp<->ABpraappa	1951.42	0.305197	27.3846	0.11429
ABalpapaa<->ABalpaaap	2311.33	0.0146046	27.3516	0.134676
ABalapaaa<->ABalaaaal	2207.81	0.573705	27.3516	0.135567
Z2<->Daa	2580.23	0.377608	27.2967	0.137944
Eala<->MSaaapp	2256.71	3.04e-05	27.2747	0.132672
ABalapapa<->ABarpaaaa	1673.13	0.792315	27.1978	0.10811
ABprppapa<->ABprappaa	2096.05	0.96692	27.1648	0.129102
Z2<->Dpp	2430.18	0.357083	27.1429	0.130156
Cppap<->Capap	2843.16	0.0243092	27.0769	0.187804
ABplaappa<->ABalppppp	2422.84	0.56474	27.0659	0.133221
Eprp<->Cpaap	2113.92	0.480239	27.022	0.125573
ABarappap<->ABarapppp	1902.39	0.000190244	26.967	0.110975
ABarapaaa<->ABaraaapa	2137.7	0.234348	26.9451	0.118408
ABalpapap<->ABalppapa	2228.63	3.28e-05	26.8901	0.133994
Eplp<->Dap	2860.65	0.64707	26.8791	0.147915
Caaap<->Caapa	4772.26	0.621048	26.8681	0.26163
ABalapapa<->ABalapaaa	1793.04	0.161074	26.8022	0.127413
ABprpaapp<->ABprppaaa	2724.37	0.781997	26.7692	0.151842
ABalaaapa<->ABalapaaa	1902.37	0.709134	26.7033	0.124763
MSpapaa<->MSaapap	2050.85	0.677894	26.6154	0.118023
Caap<->Capp	3880.68	0.00067207	26.5055	0.14296
ABalapapa<->ABplaaaaa	2347.87	0.139975	26.5055	0.158466
MSappap<->MSapppa	1352.29	0.431941	26.4176	0.0976975
Epra<->ABarppppa	1767.17	0.745134	26.3626	0.119284
ABprapapp<->ABprapppa	2336.78	0.849795	26.3187	0.134927
ABprpaaap<->ABarapppp	1843.25	0.674826	26.3077	0.1097
ABplapapa<->ABplappap	2475.56	0.922906	26.2527	0.148694
ABarpaapp<->ABarppaaa	4009.96	0.510013	26.2198	0.220838
ABplapapa<->ABarppapa	2924.45	0.0024609	26.2088	0.167856
ABplpppaa<->ABplppapa	1791.23	0.117621	26.1538	0.110515
Epla<->ABarppapa	1998.42	0.441062	26.1319	0.134597
Z2<->Cppaa	1481.1	0.560379	26.1209	0.122737
Cppp<->Capp	4415.4	0.0363904	26.0989	0.164699
Cpaaa<->ABarppppp	3260.77	0.0146559	26.033	0.183369
ABalppapa<->ABplpaaaa	1918.36	0.632178	26.033	0.115562
Cpapa<->Cpppa	2174.5	0.683547	25.989	0.134597
ABalpaaa<->ABalaaaa	3605.4	0.193382	25.978	0.134277
MSapap<->MSappa	3615.7	0.172322	25.9341	0.147726
Eplp<->Cappa	1505.3	0.346642	25.9231	0.11794
MSpaaap<->MSpaapa	2498.08	0.176019	25.8901	0.144073
ABarpaapp<->ABarpppaa	3462.38	0.0221358	25.8791	0.194057
Eal<->Epl	3501.07	0.865759	25.8352	0.104465
ABpraaapa<->ABpraaaaa	1783.07	0.262493	25.8132	0.115887
ABprppapp<->ABprappap	1602.17	0.186907	25.7802	0.102886
ABplpaapp<->ABplppaaa	2812.25	0.67653	25.7692	0.156207
Epla<->ABarppaap	2479.7	0.00219364	25.7143	0.166381
Z2<->Dap	2234.08	0.144796	25.6813	0.11937
ABalapapa<->MSaaaap	1525.44	0.706374	25.6813	0.0965356
MSppap<->MSpppa	3901.07	2.43e-05	25.6484	0.158771
MSappaa<->MSapppa	1394.88	0.477017	25.5934	0.108438
ABpraappp<->ABprappaa	2227.08	0.823108	25.5275	0.129531
ABplaappp<->ABplpaapp	1967.95	0.393618	25.5055	0.113715
Cappa<->Capap	1499.13	1.75e-11	25.4176	0.106939
ABalaaapp<->ABalaapaa	1982.97	0.133574	25.4066	0.121177
ABplpaaaa<->ABalppaap	2285.51	0.205282	25.2637	0.130599
MSaapaa<->MSaaapp	2087.28	0.0614428	25.2308	0.118915
Epra<->ABarpppap	1879.33	0.621526	25.1648	0.127333
Eara<->ABarpaapp	1785.81	0.851923	25.1429	0.10834
ABarpaapa<->ABarpaaap	2789.03	0.647216	25.1209	0.154067
Ealp<->MSappp	2592.69	0.0536728	25	0.126727
ABalaaaa<->ABaraaaa	2886.59	0.890579	24.989	0.111291
ABplapapp<->ABplapppa	2162.55	0.558796	24.989	0.124008
Capa<->ABplappp	4125.44	0.0632758	24.978	0.152802
ABpraaapa<->ABpraapaa	1959.1	0.738094	24.967	0.128662
ABprapapa<->ABarppppp	3382.26	0.0146401	24.8681	0.208911
MSpppap<->MSppppa	1217.9	0.314378	24.7253	0.0918236
ABprapapa<->ABprappaa	2255.2	0.679676	24.6593	0.136598
Cpaaa<->ABarppppa	2620.47	0.2179	24.5385	0.152647
MSpapp<->Z2	3838.18	0.30716	24.5385	0.169511
ABprppapp<->ABprappaa	1927.95	0.223705	24.4835	0.142145
MSaappp<->MSappap	1196.88	0.414156	24.4615	0.0921806
MSaapp<->MSappa	3664.74	0.451432	24.4505	0.15557
Cpaap<->Caaap	2604.84	0.230597	24.3626	0.161807
ABprpapaa<->ABarapppp	1681.62	0.179408	24.3516	0.10422
Eprp<->Dpp	2320.38	0.877486	24.3407	0.132812
ABplaaaap<->ABarpaaap	1914.89	0.0113249	24.1319	0.119124
ABplapaa<->ABplaaap	4716.02	0.000378004	24.0659	0.165644
ABalappaa<->ABarpaaaa	1654.09	0.633766	24.044	0.108991
ABaraappp<->MSpapaa	2018.65	0.80723	24.033	0.116447
Cpapa<->ABprapapp	2414.36	0.702277	24.033	0.147833
ABaraapa<->ABaraaaa	3695.03	0.0101209	23.989	0.130813
ABalpappa<->ABaraapap	2080.84	9.25e-06	23.978	0.116641
MSpapp<->MSaapp	3035.81	0.197841	23.956	0.131823
D<->P4	9275.35	0.303386	23.8242	0.15021
ABalppaaa<->MSapaaa	1139.36	0.0660729	23.7912	0.0808716
ABalppppa<->ABalapapp	1637.63	0.218584	23.6813	0.100387
ABalaaap<->ABalaapa	3277.85	0.0878787	23.6593	0.121873
ABarppap<->ABarpppa	4085.47	0.199154	23.5714	0.153475
ABalppapa<->ABalppaap	1896.51	0.202443	23.5165	0.115414
ABplpppa<->ABplppap	3948.93	0.600146	23.4945	0.141162
ABprapapa<->ABprapaap	2552.63	0.00695317	23.4835	0.159457
ABarpppaa<->ABprapaaa	1660.87	0.0617984	23.4505	0.11371
ABprpaapa<->ABpraappa	1598.86	0.335907	23.4286	0.101308
ABarapaaa<->ABaraaapp	1458.16	0.00524427	23.4176	0.0940057
ABalaapap<->MSppaaa	1419.05	0.0131491	23.4176	0.103692
ABprappa<->ABprppap	3466.09	0.356081	23.3956	0.12668
ABplaapa<->ABplaaap	3686.47	0.705882	23.3626	0.129633
ABalapapp<->ABplaaaap	1486.72	0.526003	23.3626	0.0989412
ABplaapa<->ABplaaaa	3826	0.96646	23.3407	0.134945
Capaa<->MSaappp	1259.26	0.49388	23.3187	0.104207
Dpa<->ABprpappp	1953.44	0.260262	23.2967	0.113567
Cpppa<->Cppap	1411.76	0.00878223	23.2198	0.100995
ABprpppa<->ABprppap	4116.66	0.0510887	23.2088	0.147014
ABarapaa<->ABaraaap	4577.95	0.000540561	23.1978	0.160681
MSaaaaa<->MSpaaaa	1348.73	0.0140207	23.1538	0.0824996
MSapppp<->Daaa	2005.99	0.105611	23.1429	0.146237
Dapa<->Daap	2228.49	0.402261	23.0549	0.163038
MSaappp<->Daap	2185.85	0.193518	23.044	0.162611
Cpap<->Caap	4642.82	0.00116224	23.044	0.158927
ABplappap<->ABplppapp	1513.07	0.0374442	22.989	0.0999879
ABprapap<->ABprappa	5305.21	0.0715603	22.978	0.184473
ABprppppp<->Cppaa	3403.58	0.0469253	22.8681	0.19992
MSpapap<->MSaapap	1358.59	0.316495	22.8462	0.0931687
ABplpaaa<->ABalppap	4502.53	0.485322	22.8242	0.159095
ABplpaaap<->ABplppaaa	1690.06	0.236421	22.7692	0.107122
MSappap<->Daaa	1718.11	0.825916	22.7692	0.128847
ABpraapp<->ABprapaa	3859.14	0.91955	22.7473	0.134932
ABalapaa<->ABalaaap	4160.75	0.0330514	22.7363	0.152774
ABplapap<->ABplappa	5073.41	0.0532081	22.6484	0.174909
ABpraapa<->ABpraaap	3716.38	0.165626	22.6374	0.136768
MSppppp<->Dpaa	2067.23	0.840544	22.6264	0.151561
ABalpaapp<->ABalppapa	1451.8	0.559628	22.5934	0.0987678
ABprpaaap<->ABprpaapp	1626.08	0.327014	22.5495	0.103761
ABpraappp<->ABprapaaa	1657.48	0.400869	22.5275	0.10347
ABarapap<->ABarappa	5040.85	0.000689165	22.5275	0.174553
ABaraaapa<->ABaraaaap	1798.94	0.492119	22.4945	0.101653
ABalapap<->ABplaaap	3672.99	0.85533	22.4615	0.131794
Ealp<->MSappa	2301.28	0.155697	22.3846	0.113793
ABalppppa<->ABplaapaa	2071.56	0.0125789	22.3626	0.134102
ABplappaa<->ABplppapp	1809.05	0.682528	22.3407	0.133143
ABarapapp<->MSpapaa	2510.46	0.000165521	22.3077	0.1385
Dppa<->Dpaa	1791.86	0.479395	22.2418	0.131932
MSaapap<->MSappap	1701.73	0.538716	22.2308	0.108654
ABarpappa<->ABpraapaa	1625.65	0.567999	22.2308	0.110061
ABplpaap<->ABplppaa	4380.2	0.252566	22.2088	0.154569
ABprpapaa<->ABprppaaa	1626.64	0.433796	22.1978	0.107947
ABarapapp<->ABarappap	2096.96	0.899959	22.1868	0.124797
MSpppp<->Epra	2460.75	0.967495	22.1648	0.1213
Caaap<->ABplapapp	2133.93	0.751063	22.1429	0.132345
MSapapa<->MSappaa	1427.02	0.979128	22.1319	0.101125
ABaraapap<->MSaaapa	1728.97	0.639864	22.1099	0.104582
ABarpappp<->ABprapaaa	1777.36	0.821498	22.0879	0.118923
ABalapaa<->ABplaaaa	3931.58	0.542641	22.0879	0.143792
ABarpppa<->ABprapaa	3728.52	0.148412	22.011	0.143433
Ep<->P4	13719.8	0.149227	22	0.208413
ABplapapa<->ABplappaa	1839.55	0.802299	21.989	0.116226
ABalpaapp<->ABalppaaa	1735.27	0.368917	21.967	0.112196
ABarpaapa<->ABarpapap	1895.24	0.0926007	21.9231	0.125672
ABalpappp<->MSaapaa	2507.41	0.0131739	21.8681	0.137708
ABprpaap<->ABprppaa	3969.46	0.0367115	21.8681	0.143991
ABprpaap<->ABprpapa	3113.85	0.315507	21.8571	0.112686
Dppa<->Dpap	2025.28	0.00940997	21.8462	0.152379
ABalaaapa<->MSaaaaa	1228.88	0.000573568	21.8462	0.0792383
ABpraapa<->ABprpaaa	3248.11	0.586381	21.7473	0.119393
ABprapaap<->ABprappaa	1864.53	0.579424	21.7363	0.132582
ABpraapp<->ABprpaap	4351.21	0.560695	21.7253	0.152246
ABpraaapp<->ABpraaaap	1827.5	0.00831192	21.7033	0.109924
ABplaapaa<->ABplaaaap	1475.72	0.0423446	21.6703	0.102035
ABalapapp<->ABplaaapa	1438.98	0.408943	21.6703	0.0945375
ABalpaapp<->ABalpapaa	1437.96	0.489209	21.6593	0.104098
ABarpaap<->ABarppaa	5227.44	0.687423	21.6593	0.181771
ABalpaap<->ABalppaa	4638.53	0.564895	21.6593	0.162423
MSpppap<->Dpaa	1580.63	0.0320144	21.6374	0.119879
Capaa<->Dapp	1521.45	0.424107	21.6154	0.118277
MSpapap<->MSaappa	1566.74	0.839951	21.6154	0.102281
ABalapap<->ABalappa	2770.73	0.515471	21.5604	0.10266
Cap<->Cpp	6045.46	0.432145	21.5385	0.128736
MSpappa<->MSaappa	1155.73	0.0137547	21.5385	0.103398
ABarapaap<->ABaraaapp	1400.57	0.466004	21.4835	0.0924521
Dpa<->ABprppppa	1640.12	0.474606	21.4615	0.0972816
ABaraaaap<->MSpaaaa	1557.19	0.0182274	21.4176	0.0992022
ABarpapp<->ABpraaap	3448.59	0.581358	21.4066	0.127103
Dapa<->Daaa	1574.95	0.117015	21.3846	0.116408
ABalppaaa<->ABalaaaal	1677.59	0.835303	21.3846	0.129031
Eplp<->Caaaa	1726.09	0.750415	21.3736	0.121357
ABarpaapa<->ABplaaapa	1630.75	0.517552	21.3626	0.10137
Cppaa<->Dppp	1492.96	0.0742231	21.3516	0.11066
ABplaapp<->ABplappa	4286.11	0.81974	21.3407	0.146902
MSpaap<->MSppaa	2380.06	0.128642	21.2967	0.106213
Capaa<->Daap	1919.09	0.563409	21.2747	0.140476
ABplppppp<->Capaa	3228.75	0.679475	21.2198	0.18494
ABpraappp<->ABprppapa	1572.64	0.795134	21.1758	0.0999823
P4<->Epl	4618.63	0.408589	21.1319	0.125885
ABprpapap<->ABprppaap	1907.91	0.443253	21.033	0.130173
ABplpaaap<->ABplpaapp	1407.82	0.0188281	21	0.0906972
Cappa<->Dapp	2549.51	1.08e-12	20.989	0.172534
ABalpaapp<->MSapaaa	1871.96	9.95e-05	20.9451	0.110787
Capa<->ABplpppp	3118.16	0.510619	20.9341	0.11945
MSpapa<->MSaapp	3446.95	0.277032	20.8681	0.137486
ABplaapp<->ABplapaa	4109.69	0.115552	20.8571	0.146553
Cpap<->Cppp	4205.7	0.12457	20.7912	0.147536
ABarpaap<->ABarpapa	3241.26	0.497962	20.7692	0.117923
ABplapap<->ABarppap	4202.72	0.0245688	20.7582	0.149017
P4<->Da	5896.76	0.994189	20.7582	0.158331
Daa<->ABplppppa	1760.56	0.228875	20.7363	0.104278
Cpap<->Cppa	4169.42	0.488166	20.7253	0.143361
MSappp<->Daa	2247.97	0.272736	20.7253	0.11909
Cpaaa<->ABarpppap	2000.89	0.362053	20.6923	0.130978
ABalpapa<->ABalpaap	2930.83	0.923356	20.6374	0.10607
Caaa<->ABplappp	4065.45	0.997338	20.6374	0.142135
ABalpapppp<->ABplpappaa	1686.41	0.328131	20.6154	0.125741
ABalpaapa<->ABalaaaal	3233.86	7.51e-10	20.6154	0.180144
Z2<->Cppap	1223.87	0.0023022	20.5604	0.103983
ABalppapp<->ABplpaaap	1448.98	0.536661	20.5275	0.0987352
ABalappa<->ABalaapp	2583.78	0.133637	20.5275	0.101438
MSpapaa<->MSpaapp	1783.49	0.384539	20.5165	0.10753
Epr<->MSppp	4296.25	0.00723411	20.4066	0.119279
MSaaaap<->MSpaaap	1184.05	0.427159	20.3736	0.0822946
ABprapapp<->ABarppppp	2269.54	0.173768	20.3407	0.145742
MSpapa<->MSpaap	3803.97	0.865057	20.2637	0.148861
ABalpaapp<->ABalpapap	1297.22	0.0351674	20.2308	0.0864565
MSaappa<->ABplpappap	1683.27	0.431004	20.1758	0.127656
ABalaaapp<->ABalappap	1357.65	0.655753	20.1538	0.0995641
P4<->Dp	5146.47	0.463486	20.1099	0.135819
ABaraapa<->ABarapaa	2491.56	0.00507985	20.0989	0.0965356
Z2<->Capaa	1123.89	0.141609	20.0989	0.10115
ABarappp<->ABprpaaa	2999.73	0.990013	20.0879	0.112373
Caaa<->ABarppap	4683.91	0.00490551	20.0549	0.163469
MSpappp<->MSaappp	2372.61	0.74906	20.044	0.157397
ABarpaaa<->ABalapap	2865.07	0.590768	19.956	0.109678
ABalpappap<->ABalpapppa	1347.38	0.0189853	19.9451	0.101491
ABprappa<->ABprppaa	3054.64	0.510236	19.9231	0.118896
Dap<->Dpp	3936.18	0.678381	19.7912	0.203175
ABplpappp<->MSaappp	2183.18	0.060566	19.7363	0.130991
Caaa<->ABplapap	3824.88	0.329167	19.6374	0.135268
ABplapapp<->ABplapppp	1823.4	0.594424	19.6264	0.118609
ABalapa<->ABalaaa	6160.52	0.863599	19.5934	0.142245
MSaaapa<->MSapaaa	1471.82	0.185978	19.5934	0.0931731
ABplaaaaa<->ABalapaap	1835.11	0.71106	19.5824	0.127646
Cpaa<->ABprapap	4416.47	0.0792986	19.5385	0.149404
ABalpppa<->ABalppap	2890.89	0.257608	19.5385	0.112327
ABprpaapa<->ABpraaapp	2045.78	0.858737	19.5165	0.129828
ABprpaaaa<->ABprpaapa	1375.32	0.38808	19.4725	0.0904633
ABplpppap<->ABplppapp	1432.61	0.793019	19.4396	0.0970195
MSaaaap<->ABarpaaap	1141.69	0.987036	19.4176	0.0835168
ABalappp<->ABalaapp	3067.38	0.0123897	19.2637	0.11574
ABaraaapa<->ABalaapaa	1556.2	0.380208	19.2088	0.0952474
ABarpaappa<->ABarpaapap	3282.9	0.382669	19.1978	0.248613
ABalppppp<->ABplpaapp	1528.99	0.114202	19.1868	0.0944275
ABarapa<->ABaraaa	5761.61	0.65275	19.1209	0.130162
ABarapa<->ABpraaa	5175.04	0.404576	19.044	0.117329
ABplpaaap<->ABplpapaa	1537.11	0.503864	19.033	0.108421
ABplpppap<->ABplppppa	1292.27	3.27e-08	19.022	0.0900946
Dp<->Cppp	5089.45	0.739501	18.956	0.169853
ABpraapap<->ABprapaaa	1729.41	0.0866043	18.9231	0.12164
ABarpppp<->ABprapap	3034.55	0.727975	18.9121	0.113834
ABprapapp<->Cpppa	1845.38	0.342936	18.9011	0.12522
ABplappa<->ABplppaa	2992.58	0.581263	18.8901	0.118019
ABalapaap<->ABalppaaa	1412.73	0.365753	18.8791	0.109012
Epl<->Da	2271.53	0.347914	18.8681	0.0802133
ABalaappa<->ABalaapaa	1293.39	0.314504	18.8681	0.111675
Caaapa<->Cpaapp	2208.01	0.97915	18.8352	0.167355
Eal<->MSpap	4127.39	0.567696	18.8132	0.115248
ABplaapaa<->ABalpppaa	1340.7	0.427773	18.8132	0.0987314
Ep<->D	5690.24	0.255748	18.7802	0.0987153
MSaap<->MSpaa	5720.08	0.851018	18.7692	0.150868
P4<->MSppp	6303.77	0.823908	18.7582	0.170051
ABalppp<->ABplpaa	6958.33	0.381888	18.7473	0.158363
ABprpappa<->MSpappa	2441.58	0.000707477	18.7473	0.140292
ABprpap<->ABprppp	6178.89	0.373796	18.7253	0.140698
ABalapa<->ABplaaa	7266.97	0.466745	18.7143	0.165617
ABarpaaa<->ABalapaa	2354.17	0.4707	18.7143	0.103029
ABarpppap<->ABprapaap	1307.1	0.449852	18.7033	0.0976604
ABaraaa<->ABalaaa	4626.58	0.350211	18.7033	0.10757
Caapp<->Cappa	1968.39	0.780665	18.6813	0.131953
Cap<->Cpa	5294.82	0.693678	18.6703	0.109281
ABarpapa<->ABpraaaa	3216.92	0.628685	18.5714	0.128347
ABarapapp<->ABaraappp	1485.27	0.771719	18.5495	0.0971706
ABarapp<->ABpraap	6021.95	0.897383	18.5385	0.135253
Cpaa<->ABprappp	4151.39	0.000813722	18.5385	0.142733
MSaap<->MSapa	6636.47	0.0603261	18.5275	0.175617
ABaraappp<->MSpaapa	1516.43	0.936672	18.4615	0.0914232
ABprapp<->ABprppa	8042.13	0.659313	18.4176	0.183765
ABalpap<->ABalppa	6239.11	0.416536	18.4176	0.143106
ABplpppaa<->ABplppaap	1453.34	0.865178	18.3407	0.104836
ABplpaa<->ABplppa	4184.31	0.734188	18.3297	0.0966888
ABplpap<->ABplppp	6237.79	0.0669901	18.2637	0.141005
ABpraap<->ABprpaa	5989.38	0.789562	18.2527	0.134977
ABplapa<->ABplaap	6204.64	0.00117044	18.2308	0.13847
ABalappa<->ABalaapa	2244.64	0.0822297	18.2198	0.0952966
ABarapappp<->ABarapapap	1919.89	0.132494	18.1978	0.147361
ABpraaa<->ABarppa	6065.03	0.717591	18.1978	0.140564
ABarpapp<->ABarpppa	3389.79	0.000832118	18.1868	0.142062
ABalpaa<->ABalppa	5215.84	0.661991	18.1648	0.121618
Eala<->MSapap	2229.57	0.0119518	18.1538	0.104158
ABaraaapp<->ABarapppa	1910.51	0.297906	18.1429	0.136891
ABprappp<->ABprpppa	3090.27	0.0765613	18.0659	0.134694
ABalpappap<->ABalpapppp	1278.94	0.121747	18.033	0.099476
Caap<->Capa	3077.37	0.793394	18.033	0.121816
ABplapa<->ABplaaa	5033.59	0.887741	18.011	0.11486
Caaapa<->Caaaap	3589.39	0.499999	17.978	0.277657
Cpaapa<->Cpaaap	3381.69	9.71e-08	17.967	0.261194
ABarpaap<->ABalapap	2960.17	0.360439	17.9341	0.11338
ABalppppp<->ABplpaapa	1814.53	0.0147083	17.8901	0.126744
Cpppa<->Dppp	2632.67	0.0905589	17.8791	0.172907
ABplppppp<->Capap	2615.2	0.109145	17.8791	0.166486
ABplapp<->ABplpaa	4885.49	0.00109864	17.8791	0.111296
MSpapp<->MSpppa	2633.39	0.233752	17.8571	0.12324
ABalpapa<->ABalppaa	2404.54	0.958896	17.8462	0.0969706
Cpaa<->ABarpppp	5253.73	0.00426311	17.8352	0.182003
Epr<->ABprappp	3407.8	0.350978	17.8352	0.117083
Cppaa<->Dpap	1443.73	0.947907	17.8352	0.110182
ABalapa<->ABarpaa	6182.12	0.1128	17.8242	0.140929
ABalaapp<->MSpaaa	3185.35	0.615277	17.8132	0.121053
MSpapap<->MSpppap	1370.47	0.961914	17.7473	0.096128
ABalppa<->ABplaap	8001.36	0.199324	17.7143	0.179832
ABaraaapa<->ABaraaaaa	1518.54	0.158958	17.7143	0.0993556
MSapapp<->ABalpppppp	1242.11	0.788662	17.7033	0.097694
ABarpappa<->ABpraapap	1476.68	0.0526178	17.7033	0.118072
MSaaap<->MSapaa	2491.39	0.82723	17.6923	0.113843
ABprpaaaa<->ABarapppp	1596.34	0.515517	17.6923	0.109229
Caaapp<->Cpaapp	2075.26	0.578072	17.6703	0.162684
Cap<->ABplppp	4974.09	0.325289	17.6703	0.114553
ABarapa<->ABaraap	4090.42	1.71e-05	17.6484	0.0954329
ABprapa<->ABprpaa	4425.53	1.08e-07	17.6264	0.101354
Ear<->MSpap	3605.02	0.0591655	17.5714	0.0990329
MSpap<->MSppp	4812.56	0.534078	17.5604	0.127836
ABarapa<->ABarpaa	4956.03	0.700621	17.5385	0.113864
Epra<->Cpaaa	1758.54	0.802156	17.5385	0.130885
ABprpap<->ABprppa	3845.56	0.0194316	17.5165	0.0919448
ABplpap<->ABplppa	4325.8	0.42984	17.4396	0.100574
ABprapa<->ABarppp	8638.92	0.726205	17.4286	0.196476
ABplaapppa<->ABplpaappp	1801.91	0.769999	17.4286	0.140739
ABalpaa<->ABplaaa	4939.31	0.0867763	17.3846	0.11473
ABalpaapa<->ABalpaaaa	1572.17	0.939086	17.3846	0.100726
ABplaapaa<->ABalpppap	1591.54	0.389963	17.3846	0.110742
ABprpapp<->ABprppaa	2521.09	0.799115	17.3516	0.0994922
MSpappa<->ABprpappap	1572.92	0.799744	17.3516	0.123472
MSaapaa<->MSapaap	1444.18	0.0294835	17.3516	0.0933195
MSaap<->MSpap	3865.41	0.0278847	17.3516	0.10914
ABplpaap<->ABplpapa	2238.21	0.00730349	17.3407	0.0907344
ABplpappp<->ABplppppp	1583.53	0.348794	17.3407	0.118009
ABpraap<->ABprapa	4190.46	0.897809	17.3297	0.0983915
MSpppp<->Z2	2532.64	0.70135	17.2967	0.133397
ABpraaaaa<->MSppaaa	1252.36	0.0801225	17.2967	0.0915791
ABplapp<->ABplaap	4878.81	0.355428	17.2308	0.112961
ABplpapap<->ABplppaap	1725.76	0.0819173	17.2088	0.126644
ABprppppa<->ABprpppap	1168.06	0.00500315	17.1978	0.0837827
MSppppp<->Dppa	1141.48	0.035432	17.1758	0.0997798
D<->ABprpp	8635.36	1.16e-05	17.1538	0.127312
ABplapa<->ABarppa	6466.84	0.71379	17.0659	0.147311
ABplapapp<->Cappa	1876.78	0.67231	17.0659	0.119605
ABprpappap<->ABprpapppa	1857.06	0.490224	17.0659	0.143286
Capa<->Dap	3025.83	0.148021	17.0549	0.158873
ABalapp<->ABalaap	3660.8	0.409493	17.0549	0.0925598
MSaaap<->MSaapa	3319.95	0.259914	17.022	0.147175
ABplappa<->ABplppap	2845.08	0.25654	17.011	0.122537
ABarapa<->ABarpap	3740.38	0.799389	16.978	0.0876767
MSaaap<->MSpaaa	2181.9	0.626332	16.967	0.0974715
ABalpp<->ABplpa	10422.4	0.0792078	16.956	0.151929
Caaa<->ABarpppp	3620.55	0.711042	16.956	0.136952
ABalpap<->ABalppp	4244.94	0.908435	16.956	0.100465
ABalapaap<->ABalaaaal	1355.31	0.19287	16.9451	0.106029
ABalpppap<->ABalppaap	1578.31	0.937183	16.9341	0.110222
ABarap<->ABarpa	10608.2	0.868575	16.9231	0.154058
MSpppp<->Dpa	1756.11	0.921047	16.9121	0.0996638
ABplpapa<->ABplppaa	2120.13	0.356021	16.8901	0.0868181
ABprapapp<->ABprapppp	1574.02	0.284394	16.8901	0.111016
Epr<->ABarpppp	4325.18	0.0127582	16.8791	0.15096
ABarpap<->ABarppa	3770.71	0.0255298	16.8791	0.0890615
ABplapaa<->ABarppaa	2639.42	0.947206	16.8791	0.116222
ABpraaapp<->ABpraapap	1681.18	0.556702	16.8791	0.115684
ABalaa<->ABaraa	9567.8	0.525412	16.8681	0.139498
Ea<->ABplpp	7525.66	0.0661635	16.8571	0.112214
ABarpaa<->ABarppa	4938.92	0.408094	16.8352	0.113451
ABaraapa<->MSaaaa	3153.39	0.930797	16.8132	0.117513
ABplpapp<->ABplpppa	3161.22	0.00829336	16.7692	0.123303
ABalppppp<->ABplaapap	1608.25	0.171629	16.7692	0.108044
ABalappap<->ABarpaaaa	1218.78	0.856553	16.7692	0.0923077
Cpapp<->ABprapppp	1447.96	0.308467	16.7582	0.108676
ABalaa<->ABalpa	10082.9	0.68614	16.7473	0.146352
ABarpp<->ABpraa	10035.8	0.0719806	16.7363	0.14635
ABaraapppa<->ABaraappap	1391.2	0.0762096	16.7363	0.108556
ABprpaaap<->ABprppaaa	1368.59	0.189228	16.7253	0.0976421
Caa<->Cpa	5001.99	0.0783199	16.6923	0.115654
ABprppppa<->ABprppaap	1287.4	0.377074	16.6593	0.0891731
ABalap<->ABarpa	9428.2	0.344921	16.6484	0.139016
ABplpaaa<->ABplpapa	2458.62	0.941738	16.6374	0.101101
Ealp<->MSappap	1422.79	0.0796689	16.6374	0.0975875
ABprpapap<->ABprpappp	1342.44	0.305362	16.6374	0.0969209
Cpaa<->Caap	2647.2	0.296069	16.6374	0.0975375
Epra<->Dppa	1806.01	0.413642	16.6154	0.128216
MSaa<->MSpa	8547.4	0.0005339	16.6044	0.144089
Dp<->ABprpppp	6302.33	0.747438	16.5934	0.214411
Cppa<->Dpp	3796.81	0.0639424	16.5934	0.175176
ABalpp<->ABplaa	9370.64	0.699933	16.5714	0.135562
Eal<->MSapp	3339.48	0.181461	16.5385	0.0983371
ABalapp<->ABplaap	4460.39	0.4627	16.5275	0.103532
ABarap<->ABpraa	12002.5	0.534706	16.5165	0.174102
ABarpp<->ABprap	8794.29	0.067836	16.5165	0.128123
MSpap<->MSapp	4428.34	0.174804	16.5055	0.122084
ABplpappap<->ABplpapppa	2014.97	0.504248	16.5055	0.157833
ABalap<->ABplaa	13559.6	0.604269	16.4835	0.196659
ABprapappa<->ABprapapap	2529.25	2.4e-07	16.4505	0.19605
ABalap<->ABaraa	8088.46	1.66e-06	16.3956	0.118683
ABprpapp<->ABprppap	2849.84	0.875414	16.3846	0.117885
MSpappp<->Dpap	1268.58	0.614056	16.3736	0.110237
ABprpaaa<->ABprpapa	2380.98	0.264193	16.3407	0.0990353
ABprap<->ABprpa	9467.84	0.0211106	16.3187	0.139342
Eprp<->Dppp	2068.55	0.732896	16.3187	0.151523
ABplapp<->ABplppa	5219.46	0.00694133	16.3187	0.127545
ABprapp<->ABprpaa	4049.27	0.00700149	16.2747	0.0972146
ABpraapp<->ABprapap	2416.05	0.795536	16.2637	0.102493
ABplaapppa<->ABplaappap	2327.36	0.963137	16.2418	0.18218
Eplp<->Dapp	2364.79	0.740982	16.2088	0.161903
ABprpaappp<->ABpraapppa	1662.26	0.00295865	16.2088	0.13101
MSap<->MSpa	7119.68	0.11904	16.1868	0.124596
ABalapp<->ABarpap	3601.57	0.306445	16.1758	0.0879467
MSpppaa<->ABaraapppp	1367.49	0.205957	16.1648	0.110693
ABalpaap<->ABplaaaa	2683.73	0.408607	16.1209	0.106195
Dapa<->MSapppp	1118.81	0.0279546	16.1209	0.100624
ABarapp<->ABarpap	3702.17	0.263653	16.1209	0.0884891
P4<->MSapp	4897.6	0.000423254	16.0879	0.145703
ABalaappp<->ABalappap	1163.75	0.203938	16.0769	0.0950245
ABplaapp<->ABplpaap	3072.67	0.506171	16.0659	0.122211
Caa<->ABplapp	6813.55	0.148285	16.0549	0.15032
Da<->Cppp	3240.53	0.849869	16.022	0.111765
ABalpapppa<->MSaapaaa	1527.54	0.234167	16.011	0.120859
ABalaaaal<->MSaaaaa	1005.39	0.012053	16	0.0718332
Caapp<->ABplapppp	1166.32	0.0177564	15.978	0.0972019
ABalaapap<->MSpaaaa	1221.12	0.553467	15.967	0.0840733
ABarpa<->ABplap	7122.47	0.633256	15.967	0.10576
Cpp<->ABprppp	4932.43	0.545126	15.956	0.113626
Da<->ABplpppp	5624.77	0.000112496	15.9451	0.191311
ABprpapap<->ABprppaaa	1439.1	0.524106	15.9341	0.101672
ABplpaaaap<->ABplpaaapa	1685.01	0.640866	15.9341	0.132516
ABalpppaa<->MSapaaa	1066.19	0.270455	15.8791	0.0784436
ABplappp<->ABplppap	2922.65	0.304621	15.8132	0.129771
ABalpppp<->ABplaapp	2542.48	0.0655612	15.8132	0.105591
ABalapp<->ABaraap	3549.88	0.528894	15.7802	0.0867315
ABprpappa<->ABarappap	1524.68	0.144956	15.7802	0.103716
ABplpappaa<->ABplpapapa	1785.53	0.563225	15.7692	0.140701
ABplpaappa<->ABplpaapap	1851.75	3.47e-11	15.7692	0.145827
Ep<->ABplpp	8299.82	0.000124577	15.7473	0.130306
Cap<->ABplppa	3803.6	0.0906902	15.7363	0.0912295
ABplppppaa<->ABplpapapp	1989.2	0.132687	15.7253	0.156282
Epl<->ABplappp	2885.2	0.35501	15.6593	0.107066
ABalppappa<->ABalppapap	1730.68	0.0066009	15.6484	0.137346
ABalapap<->ABplaaaa	2204.08	0.377333	15.6154	0.0952012
ABprpapapp<->ABprpapppa	1823.3	0.0944037	15.5714	0.143863
ABplaapapa<->ABplaapaap	1897.63	1.22e-05	15.5495	0.148633
ABplpapp<->ABplppap	2482.1	0.86259	15.5165	0.102953
ABplpapppp<->ABplpppppa	2168.29	0.465129	15.5055	0.171319
Z2<->Dppp	1140.49	0.0844717	15.4945	0.0919166
ABprppppp<->Cppap	1778.51	0.884792	15.4725	0.13349
MSappp<->Epla	1749.21	0.075568	15.4725	0.100023
ABalpaapa<->ABalppaaa	1710.14	0.779871	15.4505	0.107939
ABalpaa<->ABalaap	4103.29	0.942913	15.4066	0.10335
ABalpppp<->ABplpaap	1940.23	0.0286665	15.3956	0.07967
ABalpppp<->ABplpapa	2178.43	0.0264945	15.3846	0.0895302
ABplppppap<->ABplpppppa	1671.23	0.533427	15.3736	0.132949
Cpa<->ABprapp	8841.37	0.000745048	15.3407	0.193949
MSpaap<->Eara	2208.19	0.221149	15.3297	0.107618
ABalaaap<->ABaraaaa	2086.02	0.803521	15.3297	0.0953193
ABarpapp<->ABarppaa	2504.17	0.0991283	15.3077	0.104058
ABarpapaa<->ABalaappp	1198.98	0.150225	15.2967	0.0935147
ABarapappa<->MSpapaaa	1388.64	0.00631168	15.2637	0.111721
ABprpaaaap<->ABprpaaapa	1764.73	0.0315366	15.2418	0.13993
ABaraapapa<->ABaraapaap	1519.83	2.95e-12	15.1868	0.11992
ABarpaaap<->ABarpaapaa	1803.59	0.429337	15.1868	0.13194
ABaraapapp<->MSaapaaa	1423.21	0.680113	15.1758	0.113805
ABplpaappa<->ABplpaaapp	1428.2	0.870042	15.1538	0.115562
ABprpapap<->ABarappap	1169.34	0.0776141	15.1209	0.0889041
ABprpapppp<->ABprpppppa	2097.3	0.11542	15.1099	0.166058
ABalaappa<->ABpraaaaa	969.594	0.133768	15.1099	0.0906067
ABalppa<->ABplpaa	3503.17	0.315309	15.0549	0.0894176
ABarpap<->ABplapa	3829.66	0.970097	15.044	0.0929323
ABarappppp<->ABarappapa	1653.37	0.0409357	14.978	0.134017
ABalappaa<->MSaaaaa	1021.7	0.0493123	14.9121	0.0827325
ABalpppppp<->ABplaappaa	1282.33	0.0702257	14.9121	0.104075
ABarpaaa<->ABalappa	2093.93	0.209172	14.8791	0.121359
ABalppapp<->ABplpaaaa	1280.38	0.00419901	14.8681	0.0963556
ABarpaapap<->ABplaaaapp	2309.96	0.16425	14.8681	0.183305
ABprpapapa<->ABarappapp	1752.73	0.45205	14.8352	0.138616
ABprpappp<->ABprppppp	1557.37	0.187796	14.7802	0.119813
ABalpappaa<->ABalpapaap	1750.53	0.220152	14.7802	0.13964
ABaraapp<->ABarapaa	1966.59	0.31964	14.7692	0.0888264
ABalpppppp<->ABplaappap	1335.2	0.594827	14.7692	0.110936
ABprpappaa<->ABarappapp	1534.43	0.024517	14.7582	0.123897
MSpppap<->Dpap	1090.16	0.377044	14.7473	0.103363
ABalpppa<->ABplaapa	2145.94	0.00403658	14.7253	0.0984814
MSappp<->ABplppapa	2206.99	0.41731	14.6813	0.119973
ABalaap<->MSaaa	7910.01	3.55e-12	14.6703	0.190933
ABarpp<->ABplap	5964.22	0.526935	14.6593	0.091994
ABplpappa<->MSaappa	2211.43	0.0734162	14.6484	0.130126
Cpppa<->ABprapppa	908.822	7.84e-10	14.6044	0.0944467
ABaraap<->ABalaap	3444.95	0.103624	14.5934	0.0872245
ABaraaaap<->ABaraappaa	1280.28	0.483716	14.5714	0.0980936
ABarappppa<->ABarapppap	1460.78	0.0186283	14.5714	0.120283
ABplappp<->ABplpppa	2076.39	0.899724	14.5275	0.098264
ABplppppap<->ABplpppaap	1661.37	0.046289	14.4615	0.133007
ABarpap<->ABpraaa	3050.95	0.00196452	14.4505	0.075729
ABalpaapaa<->ABaraapaaa	1360.81	0.799005	14.4286	0.109508
ABarpaapap<->ABarpapapp	1834.66	0.00930821	14.4286	0.148083
MSaaapp<->MSaaapap	1454.71	0.532714	14.4286	0.116292
ABalppapaa<->ABalpaappp	1340.51	0.399838	14.3846	0.108863
ABprpaaaap<->ABarappppa	1365.85	0.808118	14.3846	0.112653
ABplapapap<->ABplappapp	1892.11	0.792827	14.3736	0.152056
Cpaapp<->Cpapap	3361.38	0.000493565	14.3736	0.268114
ABalppappa<->ABplpaaaap	1198.2	0.408009	14.3407	0.103338
Caa<->ABarppp	7221.25	0.52138	14.3187	0.162167
ABaraapp<->MSpaaa	3060.96	0.064478	14.3187	0.114567
Ea<->ABplpa	5964.32	0.437286	14.3077	0.0963019
ABalpapapa<->ABalpapaap	1812.63	0.01063	14.2857	0.146299
ABprpappp<->MSpappp	1476.83	0.187054	14.2857	0.103379
Cpap<->ABprappp	2902.81	0.342613	14.2857	0.115878
ABplapapaa<->ABplappapa	2037.64	0.035642	14.2747	0.162993
ABplaapp<->ABplapap	1983.56	0.927955	14.2637	0.0827476
Eprp<->Cpaaap	1829.22	0.908332	14.2637	0.145396
Epla<->ABarppapp	1248.8	0.0312087	14.2198	0.112188
ABplpapppp<->ABprpapppp	1610.15	0.129076	14.2088	0.132782
ABpraapaap<->ABpraapapa	1996.41	0.00401902	14.2088	0.158633
ABaraapa<->ABaraaap	1823.31	0.0030817	14.2088	0.0810923
Dapp<->Daap	1099.26	0.0477248	14.1758	0.0990482
Ea<->MSpp	11573.4	0.357289	14.1648	0.185631
ABalaapa<->ABaraaaa	1548	0.217616	14.1648	0.080355
ABplap<->ABplpa	5569.37	0.685572	14.1538	0.0857958
ABaraappa<->ABaraaaap	1086.79	0.162583	14.1429	0.081702
Epra<->MSppppp	1306.33	0.773023	14.1429	0.108324
Eplp<->Caaapp	1592.71	0.0985837	14.1319	0.125385
MSpaaaap<->MSpaaapa	1658.72	0.51551	14.1099	0.132517
MSpap<->MSppa	3072.42	0.470441	14.0659	0.095133
ABplpppppp<->ABprpppppp	1894.68	0.00244544	14.022	0.154436
ABarpaapaa<->ABplaaaapp	1543.94	0.0293887	14.011	0.124609
ABplaapppp<->ABplappaaa	2493.91	0.0106964	14.011	0.199412
MSaapa<->MSapaa	2835.1	0.0570164	13.989	0.129532
Caaapp<->Cpapaa	2950.97	0.13237	13.978	0.240561
Cap<->Epl	5638.91	0.325861	13.967	0.132403
MSppapa<->ABpraaappa	1300.08	0.125161	13.956	0.0998273
ABplpppaap<->ABplpppapa	2059.75	0.718964	13.9341	0.164417
ABarpapaap<->ABarpapapa	2047.59	0.0583615	13.9231	0.163603
ABarappa<->ABprpaaa	2202.26	0.505171	13.9121	0.0997057
ABplaapapp<->ABplaappaa	1293.55	0.0806727	13.9011	0.107145
ABpraaapp<->MSppapa	1477.5	0.178768	13.8681	0.090908
ABplppp<->Epl	4357.14	0.0247285	13.8571	0.105723
ABprppppap<->ABprpppaap	1537.65	6.11e-08	13.8352	0.124442
ABplpaaapa<->ABplpaapaa	1379.43	0.00257258	13.8352	0.113356
Epla<->Dapa	1846.74	0.955917	13.8242	0.128534
ABalaappp<->MSpaaap	1022.32	0.927472	13.7802	0.0803418
ABarpaapaa<->ABarpapapa	1499.52	0.117324	13.7692	0.122096
Caaaa<->ABplapapp	2158.22	0.736789	13.7582	0.132742
Eplp<->Cappp	878.997	1.72e-05	13.6923	0.102544
ABplpppppp<->ABplpppapp	1877.52	0.157853	13.6154	0.152503
ABalaapa<->MSaaaa	1968.95	0.074464	13.5934	0.0958346
ABpraapppa<->ABpraappap	2087.77	0.131865	13.5714	0.167591
Dppa<->ABpraapppp	1043.55	0.70743	13.5604	0.0953003
Daa<->MSaappp	2337.06	0.020775	13.5604	0.133916
ABarapap<->ABpraaaa	2585.24	0.22182	13.5385	0.107817
ABprppppaa<->ABprpppaaa	1621.78	7.01e-05	13.5275	0.132607
Dpa<->MSpappp	1899.73	6.49e-07	13.5275	0.114713
ABprpppaap<->ABprpppapa	1909.89	0.0622774	13.5165	0.152905
ABarpapa<->ABalappp	1824.24	0.144164	13.5165	0.0804565
ABprppp<->Dp	7777.49	0.00500232	13.5165	0.186492
ABalpppaa<->ABplaaaaa	1232.85	0.251711	13.5055	0.0920789
ABprpappp<->ABprppaap	1669.18	0.146486	13.4725	0.110107
ABplpapapa<->ABplpapaap	1842.84	0.0580289	13.4615	0.148837
ABalppappa<->ABalpapapa	1310.58	0.176982	13.4505	0.112038
MSp<->Ea	12748.8	0.0860749	13.4396	0.15106
Ep<->Ca	5990.87	0.0325128	13.4286	0.0837745
ABpraaappp<->ABpraappaa	1370.59	0.000339214	13.4286	0.110053
ABprpapa<->ABprppaa	1910.37	0.0394821	13.4176	0.089947
ABplaaaaap<->ABplaaaapa	1977.57	0.0152248	13.4176	0.158214
ABalpa<->ABplaa	5886.07	0.00488382	13.4066	0.0966142
ABprapp<->Epr	4427.64	0.00508267	13.4066	0.106692
ABalpapa<->MSaaaa	3067.28	0.363027	13.3516	0.12778
ABplpaaapa<->ABplpaapap	1263.28	0.160308	13.3516	0.107076
MSaaaaap<->MSaaapaa	1326.25	3.01e-06	13.3407	0.108185
ABarpppa<->ABpraapp	2185.02	0.0815303	13.3407	0.100527
ABalppapap<->ABalpapapa	1249.05	0.276402	13.3297	0.104996
ABprpapapa<->ABprpapaap	1399.83	0.0187137	13.2527	0.114856
MSaapap<->ABalpapppp	1650.78	0.65851	13.2418	0.111739
ABaraaaaa<->ABaraaapaa	2313.69	0.139512	13.1978	0.162706
ABarapppaa<->ABaraaappp	2143.83	0.364414	13.1868	0.172943
ABalaapa<->ABaraaap	2201.05	0.0293704	13.1538	0.111293
ABprap<->ABprpp	5782.97	0.383675	13.1538	0.093737
ABarappppa<->ABarappapa	1309.15	0.39154	13.1209	0.107941
ABalappap<->MSaaaap	1233.23	0.319944	13.1209	0.0908524
Capaa<->ABplppppap	1057.43	0.827057	13.0989	0.0956589
MSpppp<->ABprppapa	1854.3	0.82006	13.0879	0.104277
Dap<->Cappa	1640.33	0.676805	13.0879	0.0986471
ABalpppp<->MSapaa	3314.24	0.545986	13.0769	0.119756
ABalppappp<->ABplpaaaap	1029.91	0.509094	13.0769	0.0901864
ABplpapppp<->ABplppppap	1174.31	0.823301	13.0659	0.101847
ABalaaaar<->ABalpaapaa	1802.05	0.0987249	13.033	0.126778
ABarappp<->MSppaa	3306	0.816427	12.989	0.122365
ABarpapa<->ABalaapp	2066.76	0.544237	12.978	0.105583
ABalpapp<->MSaaap	2831.5	0.946277	12.978	0.107188
ABplapaa<->ABalappp	2582.43	0.345516	12.978	0.10131
MSapap<->ABalppppp	2650.62	0.339097	12.956	0.130784
Cpap<->Capp	2433.69	0.600349	12.956	0.104679
ABarppppp<->Cpaapa	2353.87	0.208063	12.956	0.165241
ABalaapppp<->ABpraapaaa	1808.14	6.17e-05	12.9451	0.147812
Epra<->Dppp	1435.07	0.839811	12.9451	0.137151
Dpp<->Cpppa	1319.01	0.86588	12.8791	0.0878734
ABalpapaa<->ABalppapa	1289.83	0.394121	12.8791	0.107014
ABalappa<->ABalaaap	1768.17	0.178856	12.8681	0.101233
MSaappp<->ABplpapapp	1029.12	0.744788	12.8681	0.0898008
Dpp<->Cppaa	2556.96	0.182503	12.8571	0.143741
ABplppp<->Da	5219.04	0.0158796	12.8571	0.125255
ABplpppp<->MSappp	3249.35	0.00127872	12.8022	0.125767
ABalaaapar<->ABalaaappl	1768.61	0.109009	12.7912	0.145655
ABpraaappp<->ABpraapapp	1081.07	0.998079	12.7802	0.0950212
MSpppap<->ABprpapaap	1380.37	0.131359	12.7582	0.11448
Cpaaaa<->ABarpppapa	2099.26	0.108218	12.7363	0.171613
Daa<->ABplppapp	1268.14	0.84263	12.7143	0.0985126
ABaraap<->MSpaa	7359.71	0.360687	12.7143	0.173598
ABprpppppp<->ABprpppapp	1648.61	0.213937	12.6923	0.136184
ABalpappp<->ABalppapp	1434.97	0.305284	12.6703	0.108975
ABarapp<->MSpaa	5091.72	0.513373	12.6703	0.121692
ABplaapa<->ABalppaa	2457.42	0.631818	12.6703	0.101263
ABaraaaap<->ABaraapaaa	1249.98	0.0960743	12.6593	0.0990185
ABpraa<->ABprpa	5506.58	0.469106	12.6484	0.0900779
Cpapaa<->Cpappd	2396.29	0.0277697	12.6374	0.193753
ABalppappp<->ABplpapaaa	1532.96	0.699171	12.6374	0.126711
MSpppaa<->ABprpapaaa	1381.84	0.013295	12.6044	0.113665
MSpaap<->Eala	1986	0.00718996	12.5165	0.098244
Epla<->Dapp	1486.13	0.38268	12.4725	0.131648
Caapa<->Cappp	907.057	0.135468	12.4505	0.0961954
ABalpap<->MSaaa	8549.81	0.622055	12.4396	0.200624
Dpp<->ABprppapp	1561.92	0.362218	12.4176	0.110868
ABalaaaal<->ABalpaapaa	2377.16	0.00362984	12.3956	0.158294
ABprapapap<->ABprappapp	1883.34	0.00682859	12.3736	0.152979
ABalpapapp<->ABplpapaaa	1634.1	0.764688	12.3516	0.136087
ABprappp<->ABprppap	2456.36	0.509416	12.3516	0.124056
Eal<->ABplpap	3661.85	0.561081	12.3516	0.092424
Cpappd<->ABprapappp	1648.38	0.194432	12.3407	0.135413
ABalaapppp<->ABpraaapaa	1212.32	0.00413624	12.3077	0.100508
ABaraapapp<->MSaaapap	1187.57	0.0856615	12.3077	0.099492
D<->Cpp	8547.48	0.148208	12.2747	0.15404
ABprapapaa<->ABprappapa	1966.94	0.589604	12.2088	0.159584
Capp<->Dap	2596.61	0.798026	12.2088	0.118084
ABalapappa<->ABplaapaaa	1019.31	0.264962	12.2088	0.0895227
ABalpaapp<->MSaaapa	1292.11	0.823711	12.1978	0.094909
Cpapa<->Cpppp	902.306	0.0412934	12.1758	0.0861232
ABarapp<->ABaraap	2989.04	0.599888	12.1648	0.0854614
Capa<->ABplppppp	3999.84	0.463094	12.1538	0.204012
Eara<->MSppaa	1744.13	0.00109523	12.1429	0.0929567
C<->P3	20380.7	0.358087	12.1319	0.161027
ABarpaapaa<->MSpaaapp	1091.21	0.183598	12.1319	0.0915876
ABarpapppp<->ABprapaaaa	1900.99	0.00294197	12.1209	0.15644
ABarppaaa<->ABarpaappp	2423.88	0.850019	12.0769	0.177242
ABprpppaa<->ABprapppa	1118.88	0.213917	12.0769	0.10035
ABalpppa<->ABalpapp	2711.23	0.00137477	12.0769	0.119855
ABprpap<->Epr	3776.47	0.890325	12.0769	0.0980789
MSaaapap<->MSaaaapp	1494.37	0.0112295	12.044	0.122065
ABpraapppp<->ABprappaaa	2236.05	0.00953338	12.011	0.182069
ABarappppp<->ABprpapaaa	1101.75	0.735274	12	0.0933823
ABaraapp<->MSaaap	2376.13	0.248329	11.978	0.0987075
MSaaaaap<->MSaaaapa	1269.95	0.0906001	11.978	0.103281
Da<->Capp	2743.72	0.090486	11.978	0.114547
ABalaapppa<->ABalaaappr	1389.08	0.106303	11.956	0.115623
Ealaa<->MSaapaap	1333.7	0.199734	11.9451	0.110749
Daa<->ABplppppp	1843.73	0.356271	11.9341	0.123571
ABplpaaa<->ABalppaa	2006.16	0.384854	11.9231	0.0949302
ABplaaaaaa<->ABplaapaaa	1519.49	0.511252	11.9011	0.127825
ABarpaap<->ABalappp	1932.22	0.462671	11.8571	0.0978361
ABarppapp<->Caaaap	2845.29	0.189107	11.8352	0.209628
ABalpapp<->MSaapa	3093.62	0.960515	11.8242	0.120278
ABplapaaap<->ABplapaapa	2636.85	0.33665	11.7912	0.214023
Capp<->Eplp	2680.37	0.0471255	11.7692	0.117627
MSappap<->ABplpapaap	1218.26	0.994784	11.7692	0.105569
ABpraaapap<->ABpraapaap	1267.03	0.308722	11.7582	0.107951
Ca<->ABarpp	10637.9	0.102302	11.7582	0.150419
Ca<->ABplap	10044.6	0.0445712	11.7363	0.143639
Eplp<->Caaaap	1432.33	0.217242	11.7363	0.112991
ABprpapaa<->MSpppap	1168.07	0.781501	11.7143	0.0954414
Cp<->ABprap	12400.6	0.00122671	11.6923	0.175135
ABarpapppa<->ABpraapapp	1568	0.481721	11.6923	0.136254
Ea<->MSpa	6709.75	0.923968	11.6813	0.130347
ABarpaapa<->ABplaaaap	1348.27	0.143187	11.6703	0.102593
Ca<->ABplpp	9572.1	0.186435	11.6484	0.135171
ABprpaappa<->ABpraappap	1190.1	0.272913	11.6484	0.103484
Cpaa<->ABprappa	2162.3	0.55772	11.6484	0.0914707
ABaraaapap<->ABaraaappa	1306.47	0.73197	11.6044	0.112541
ABarappapp<->ABprpapaap	1120.32	0.777621	11.5934	0.0970791
Caapa<->Caaapp	2314.08	0.0110328	11.5934	0.192943
ABarpapa<->ABaraaap	2297.6	0.00982211	11.5824	0.0942822
ABplaaaaap<->ABplaapaap	1182.42	0.133413	11.5714	0.0993045
ABprappapa<->ABprappaap	1730.15	0.229131	11.5604	0.141763
Cp<->D	11942.3	0.00146871	11.5495	0.168277
Daa<->Capaa	1474.99	0.127537	11.5495	0.091797
Cppaa<->ABprppppap	1021.49	0.141615	11.5385	0.0929136
ABarapp<->MSppa	5822.06	0.062508	11.5165	0.139333
ABalppp<->MSapa	7274.92	0.735074	11.5165	0.172365
Capap<->ABplpppppa	1019.94	0.33363	11.4725	0.0962096
Ealap<->Ealpa	2150.02	0.59147	11.4505	0.175617
MSaapp<->ABplpappp	2262.66	0.888798	11.4505	0.124374
ABprpap<->MSppp	5081.48	0.543506	11.3956	0.12238
ABarppapp<->ABplapapaa	2436.68	0.000720664	11.3516	0.187778
Epra<->Cpaaaa	1935.58	0.285963	11.3407	0.145696
ABaraapapa<->MSaaapaa	1030.19	0.410528	11.3297	0.0912025
ABprpppppa<->ABprpppapp	1215.92	0.537014	11.3187	0.106355
ABprpapp<->ABprpppa	2632.54	0.372898	11.2857	0.119357
ABalpapap<->ABalppapp	1454.25	0.708776	11.2637	0.118755
ABala<->ABara	17979.3	0.553245	11.1758	0.172142
ABplppaaa<->ABplpaappp	1483.76	0.00749832	11.1648	0.113748
ABaraaaap<->MSpaaaaa	1048.35	0.209493	11.1648	0.0876799
ABpraapa<->ABpraaaa	2171.7	0.0660379	11.1538	0.0895883
P3<->ABprp	14307.5	0.0552194	11.1209	0.137608
ABarpap<->MSpaa	3647.61	0.646675	11.0989	0.089408
Dpa<->MSpppap	1894.26	0.0859702	11.0879	0.110382
MS<->E	17635.3	0.171861	11.0879	0.123282
ABarp<->ABpra	16184.7	0.833755	11.044	0.154486
ABalaaappr<->MSpaaaaa	1031.94	0.456713	11	0.0914506
Cppap<->ABprpppppa	1017.22	0.604987	11	0.0939238
ABprappapp<->ABprappaap	1522.55	7.31e-05	10.956	0.128208
ABala<->ABpla	15622.8	0.0334303	10.9451	0.149301
ABarp<->ABpla	17708.5	2.18e-06	10.9451	0.16868
ABarppapa<->ABplapapaa	2699.52	0.478892	10.9341	0.199463
Cp<->ABprpp	8123.67	0.0766	10.9231	0.118183
ABprpa<->MSpp	12526.1	0.160698	10.9231	0.189775
ABalp<->ABpla	14501.7	0.00959369	10.9231	0.138675
ABalapapap<->ABplaaaaaa	2129.22	0.00104542	10.9121	0.173686
ABplaaaapa<->MSaaaapp	1071.22	0.00185446	10.8901	0.0895342
ABarapppap<->ABarappaaa	1386.36	0.124273	10.8901	0.115754
ABprppaaa<->ABprpaappp	1609.53	0.80326	10.8791	0.123452
MSppaa<->ABarapppa	1791.77	0.213331	10.8681	0.0982357
MSppap<->ABarapppp	2034.7	0.261733	10.8681	0.105826
ABplpap<->MSapp	5708.08	0.601796	10.8462	0.135436
MSappa<->MSaapap	2694.07	0.0871564	10.7912	0.146825
ABplpa<->MSap	9963.42	0.901794	10.7802	0.150789
ABprpaa<->MSppa	4119.8	0.367654	10.7692	0.103589
Ealap<->Ealpp	1715.85	0.0232827	10.7253	0.142636
MSpapap<->ABarapappp	1621.55	0.0106197	10.7143	0.111819
Dpa<->ABprppppp	1530.54	0.720314	10.7143	0.109108
ABalpp<->MSap	6709.23	0.116907	10.6703	0.102513
ABarpapa<->ABpraaap	2633.52	0.787427	10.6593	0.126131
Capap<->ABplpppppp	1065.77	0.70765	10.6264	0.0969686
Cpp<->Da	5127.82	0.462135	10.6044	0.120156
Cpp<->Dp	5419.19	0.00186086	10.5934	0.127834
Capaa<->ABplpapppp	948.657	0.481273	10.5934	0.0905201
ABplppapap<->ABplppappa	2406.88	0.000214766	10.5824	0.198386
Dp<->Cppa	2623.13	0.00899163	10.5714	0.121198
ABplapap<->ABalappp	2631.7	0.0264239	10.5604	0.10578
Ep<->Cap	8280.68	0.65494	10.5495	0.146447
ABalpa<->MSaa	10437.5	0.102103	10.5165	0.157059
MSaaap<->MSpaap	1478.61	0.248399	10.5055	0.095424
ABarpapppa<->ABarpappap	2401.92	0.629752	10.4725	0.197305
ABpraapppp<->ABprppapap	1262.77	0.407926	10.4505	0.11146
ABprapppp<->ABprapappp	2465.98	0.017675	10.4396	0.179007
ABplppppap<->ABplpppapa	1014.68	0.00435637	10.4286	0.0937
ABplpapp<->MSappa	2994.91	0.0652015	10.4286	0.116106
ABalaapppa<->ABalappapp	1531.31	0.256373	10.4176	0.127324
ABplppaaa<->ABplpaaapp	1936.24	0.87799	10.4066	0.145449
ABalpaapa<->ABaraapaa	979.797	0.164989	10.3846	0.0829016
ABarapappp<->MSpapapa	1619.99	0.00357986	10.3516	0.133477
ABarppppp<->Cpaaap	2209.46	0.933922	10.3407	0.161784
ABalappaa<->ABalaaapar	1356.42	0.703905	10.3077	0.11359
ABarpapaa<->ABalaappa	1513.74	0.707337	10.2967	0.100273
Dpa<->ABprppapp	1264.32	0.462738	10.2967	0.099163
ABplaapa<->ABalpaap	2273.3	0.377539	10.2967	0.0979655
ABplppap<->MSappp	2037.01	0.725674	10.2857	0.104574
MSpappa<->MSpapapp	1817.06	0.215959	10.2637	0.150935
ABarap<->MSpa	8522.57	0.687397	10.2637	0.128193
ABarpapaaa<->ABpraapaaa	1127.79	0.990959	10.2418	0.0991291
ABarpapapp<->ABarpappap	1926.3	0.868353	10.2308	0.159215
ABprappa<->ABprpppa	2265.62	0.921038	10.2198	0.110881
ABara<->ABpra	8477.18	0.170246	10.2088	0.082752
MSpaap<->ABaraappp	2111.23	0.20804	10.1758	0.107111
Cppp<->Dpp	3513.4	0.0343264	10.1648	0.146382
ABarppaa<->ABalappp	1924.49	0.676498	10.1648	0.0963058
Ea<->P4	3677.52	0.033026	10.1319	0.0847761
ABarppaa<->ABpraaap	3162.4	0.0643362	10.0989	0.123545
MSapp<->ABplpapp	5472.83	0.339103	10.0549	0.179137	4th
Daa<->MSappap	2158.9	0.0412992	10	0.122952
ABprppaaa<->ABprpaaapp	1700.64	0.0195848	9.97802	0.13078
ABalaaappl<->ABalappapa	1656.6	0.00554142	9.97802	0.139196
ABalpppa<->ABalaapp	2460.13	0.684434	9.96703	0.0988897
ABarappa<->ABpraapa	2171.3	0.409463	9.96703	0.0941026
ABpraap<->MSppa	4638.9	0.00882665	9.96703	0.110817
ABplpppaaa<->ABplppappp	1458.35	0.00671769	9.92308	0.123786
E<->P3	20704.1	0.479928	9.85714	0.156184
MSpaaaap<->MSpaapaa	1476.25	0.0387654	9.84615	0.122331
Dap<->Capaa	2489.57	0.103317	9.83516	0.141785
Cppa<->ABprppppp	4020.37	0.0629306	9.81319	0.201957
ABarpaaap<->ABplaaaapa	1341.94	0.260504	9.81319	0.108123
ABalpppa<->ABplpaaa	1604.08	0.0583137	9.78022	0.0922213
ABaraapppp<->MSpaapap	1384.39	6.93e-05	9.71429	0.114596
ABprppapap<->ABprppappa	2354.38	0.421452	9.7033	0.19461
ABarapapap<->ABarappaap	1202.09	0.958348	9.65934	0.106647
MSaapp<->MSapap	2398.05	0.254549	9.65934	0.110047
ABarpaapa<->ABalapapp	1134.32	0.00494952	9.65934	0.0913187
ABprpapa<->MSppap	2125.69	0.096085	9.65934	0.0941788
ABprpppaaa<->ABprppappp	1715.07	0.831734	9.6044	0.142771
ABar<->ABpl	19984.6	0.333377	9.54945	0.126669
MSppp<->ABprpapp	5396.78	0.159122	9.52747	0.178476
ABprapaaap<->ABprapaapa	2329.28	0.0839544	9.51648	0.191826
ABplpppaaa<->ABplppappa	1286.07	0.037984	9.50549	0.110418
ABarappapa<->ABarappaap	1036.44	0.0909534	9.50549	0.0898296
MSppa<->ABarappp	5545.77	0.0197302	9.50549	0.183021
ABaraappap<->MSpaapaa	1242.12	0.105034	9.49451	0.104451
MSapa<->ABplpapa	3919	0.902574	9.48352	0.129967
ABarpppp<->Epra	3344.85	0.833777	9.48352	0.143571
ABalaaappr<->ABalaappaa	1785.64	0.708854	9.43956	0.148553
ABpraappp<->ABprapapa	1670.38	0.5889	9.40659	0.111576
Epla<->Dap	1529.68	0.716674	9.3956	0.121263
MSapa<->ABalpapp	4284.52	0.0277832	9.38462	0.142341
Dp<->Z2	5598.87	0.0193212	9.35165	0.195868
ABalpaappa<->ABalaaaalp	2108.24	0.425509	9.35165	0.174093
Epr<->Cpap	1554.91	0.129263	9.34066	0.0752205
MSppa<->ABprpapa	4200.92	0.10693	9.30769	0.140063
ABprapaapp<->ABprappapa	2211.96	5.57e-07	9.2967	0.182074
ABprppappa<->ABprappaaa	1919.21	0.837063	9.28571	0.159444
ABalpapppp<->MSaapapa	1783	0.715594	9.27473	0.147642
MSp<->Ca	6460.75	0.450273	9.24176	0.0841167
ABarpppp<->Cpaaa	5002.02	0.996474	9.24176	0.209859
ABprapaapp<->ABprappaaa	1894.58	9.97e-05	9.20879	0.158136
ABprapaap<->ABpraapppp	2418.86	0.0183842	9.1978	0.168796
Cppp<->Eprp	2777.93	1.65e-07	9.1978	0.120971
ABarppppp<->ABprapapaa	2690.38	0.327419	9.1978	0.199305
ABalpap<->ABalaap	2981.55	1.14e-08	9.17582	0.0948345
MSpappp<->MSpapapp	1422.64	0.000258681	9.16484	0.124685
MSapa<->ABalpppp	3171.62	0.921745	9.06593	0.106
ABar<->ABpr	19882.9	0.00179192	9.06593	0.134706
Cpa<->Epr	4338.64	0.888527	9.05495	0.103042
Capp<->ABplpppp	2097.21	0.137768	9.04396	0.0987595
ABplppapa<->Daaa	1267.38	0.193706	9.01099	0.0875578
ABprpppppp<->Cpappv	1364.55	0.798525	9	0.131965
ABarpppapa<->ABarpppaap	2674.83	0.000148015	9	0.221726
ABplppapaa<->ABplppaapa	1840.13	0.79931	8.98901	0.153023
ABpraapapp<->ABarpappap	1422.48	0.908113	8.97802	0.123573
ABarppaa<->ABarpppa	1647.73	0.19117	8.96703	0.0977246
ABal<->ABpl	15848.8	0.000399619	8.93407	0.107657
ABaraaapap<->ABarapaaaa	1226.57	0.689309	8.93407	0.107333
ABprappp<->Eprp	2839.82	0.019166	8.91209	0.118558
ABprppappp<->ABprappaap	1547.93	0.532859	8.9011	0.131258
MSpaaapp<->MSpaapap	1082.33	0.300656	8.89011	0.0935245
ABplaappp<->ABplapapa	1223.06	0.0296965	8.87912	0.100461
MSaapaap<->MSaapapa	1260.61	0.0664774	8.86813	0.105951
ABprppapaa<->ABprppaapa	1944.36	0.902934	8.85714	0.161301
Dpp<->ABprppppp	1837.04	0.982079	8.81319	0.139084
MSpppa<->MSpapap	2193.47	0.327809	8.79121	0.123529
P4<->ABprpp	4134.84	0.0572614	8.78022	0.0849219
ABplpapapa<->ABplppaapa	1708.33	0.0209572	8.72527	0.143914
ABprpppaap<->ABprppappp	1483.76	0.0900199	8.71429	0.12465
Eal<->ABplappp	2181.07	0.0313476	8.7033	0.0949463
Dppp<->Cpppaa	2570.83	0.329825	8.69231	0.21275
Dap<->ABplppppp	1962.74	0.934887	8.64835	0.145129
ABprpppaaa<->ABprppappa	1249.76	0.131135	8.64835	0.108743
ABarapaaa<->ABaraaapap	1771.52	0.102233	8.62637	0.123335
ABprpaap<->ABprappa	2336.27	0.281841	8.6044	0.110604
P4<->ABplppp	3139.11	0.00952456	8.6044	0.115344
Da<->Z2	6123.1	0.00123592	8.58242	0.213643
ABarppppp<->ABprapapap	2047.92	0.310903	8.54945	0.155027
Ealpa<->MSaapapp	1604.12	0.949731	8.54945	0.135993
Earp<->MSpapaap	2155.45	0.0349113	8.41758	0.159309
Epla<->Caaaaa	1884.27	0.1585	8.38462	0.142551
E<->C	11113.8	0.162577	8.35165	0.0892832
ABarpppapp<->ABarppppap	2286.73	0.30229	8.32967	0.191036
ABplappaap<->ABplppappa	1092.34	0.167644	8.27473	0.0981859
Ealpp<->Eplaa	2344.71	3.92e-05	8.26374	0.194879
ABarpapppp<->ABarpppaaa	1841.92	0.386974	8.24176	0.156587
Dpa<->MSppppp	1663.73	0.600426	8.23077	0.0997541
MSppaaa<->ABpraaapaa	1130.34	0.163315	8.12088	0.0959166
Cppaa<->ABprpapppp	803.113	1.89e-06	8.01099	0.0837684
Eplaa<->ABarppaapa	2011.08	0.411793	7.92308	0.169173
Cppp<->Cpapp	5250.71	0.00507163	7.91209	0.225518
Epra<->Dpp	1407.54	0.0123983	7.85714	0.110677
MSpapapp<->MSaapapp	1348.61	0.221612	7.73626	0.116167
ABprp<->MSp	10483.2	0.0157408	7.73626	0.106137
MSpp<->ABpraap	5307.81	0.000714785	7.72527	0.11356
ABalappaa<->ABalappapa	1460.57	0.509281	7.72527	0.122211
MSaapa<->ABalpappp	4047.4	0.157837	7.69231	0.180895
MSpaa<->ABaraapp	6526.21	0.320615	7.67033	0.211045
MSap<->ABalppp	7612.3	0.489563	7.64835	0.163177
ABal<->MS	25519.1	0.839428	7.63736	0.167138
ABplpppp<->Daa	4406.05	0.000234923	7.62637	0.168214
MSaappp<->MSaapapp	1137.02	0.049351	7.61538	0.103449
ABalappaa<->ABalaaappl	944.093	4.16e-05	7.58242	0.0917494
MSpp<->ABprpap	7754.14	0.59685	7.56044	0.165632
ABalaapppa<->ABalaappap	1088.58	0.748653	7.54945	0.0990063
MSap<->ABplpap	7236.7	0.667785	7.54945	0.15622
Cppap<->Cpppap	1535.86	0.122618	7.54945	0.128779
ABalp<->MSa	19561.4	0.000581891	7.52747	0.19606
Daa<->MSapppp	1881.36	0.525111	7.51648	0.109377
Epr<->MSpppp	2529.12	0.481922	7.50549	0.0970766
ABpl<->MS	20763.1	0.806692	7.48352	0.139237
ABpl<->E	16048.1	0.268291	7.48352	0.10708
Ealpp<->Earpp	2037.96	0.752594	7.47253	0.170802
ABplp<->MSa	11130	0.981737	7.42857	0.112373
Ea<->Caa	4670.26	0.332865	7.37363	0.0879929
ABara<->MSa	10520.6	0.114415	7.35165	0.105847
MSaaa<->ABalpapa	4005.58	0.863481	7.35165	0.128561
ABplpapaap<->ABplppaapa	1205.23	0.734387	7.32967	0.110029
ABarppap<->Caaaa	4710.03	0.411577	7.31868	0.207121
Epl<->MSappp	2465	0.8313	7.31868	0.0955347
ABarpapaaa<->ABarpaaaaa	1554.1	0.922271	7.27473	0.132071
MSaaa<->ABalpapp	4046.48	0.0507932	7.25275	0.130295
ABplpaap<->ABplappa	1919.59	0.0511452	7.23077	0.103596
MSaapap<->MSaapaap	1727.06	0.827277	7.21978	0.125776
ABarppppa<->ABprapapaa	2148.65	0.5594	7.16484	0.162686
ABprapppa<->ABprpppaap	1728.01	0.686769	7.0989	0.137068
P4<->MSpp	3289.8	0.000536364	7.04396	0.104417
P3<->Ep	16972.3	0.746582	6.98901	0.172372
MSappp<->MSapapp	2703.38	0.457096	6.97802	0.148465
ABarpaaa<->ABarpaapa	3201.17	0.418063	6.95604	0.145302
ABplp<->Ea	14127	0.424555	6.93407	0.142308
ABaraaapp<->ABaraaapap	2604.47	0.12711	6.93407	0.167716
ABarappaa<->ABarapapaa	1531.97	0.273961	6.89011	0.109111
ABprppaaa<->ABprppapaa	1922.41	0.279856	6.85714	0.153118
ABarpp<->Caa	10718.8	0.131805	6.82418	0.173497
ABalpapaa<->ABalpaapap	2145.52	0.0785173	6.75824	0.134925
ABpra<->MSp	8167.68	0.90931	6.74725	0.084723
MSpa<->ABarapp	5812.35	0.649653	6.7033	0.120621
Cpppp<->ABprpppppp	992.278	0.755993	6.7033	0.0889308
C<->ABprp	14684.8	0.375529	6.68132	0.132625
MSaapp<->MSaapap	3633.14	0.389871	6.68132	0.19155
ABplppaap<->ABplppppaa	1448.95	0.00973297	6.68132	0.115318
ABaraapaa<->ABalpaapap	1442.22	0.889255	6.67033	0.0897314
ABplaappa<->ABalpppppp	2669.35	3.73e-05	6.62637	0.161016
Cpppp<->Cpappd	1160.22	0.434622	6.61538	0.0949457
MSaaa<->ABaraapa	3494.06	0.89717	6.61538	0.115545
MSp<->ABarap	10031.3	0.839449	6.6044	0.13889
C<->ABpra	13664.9	0.41143	6.6044	0.125402
C<->ABarp	13591.5	0.71335	6.59341	0.124363
MSaa<->ABalpap	7840.59	0.00487331	6.58242	0.163513
ABprppaap<->ABprpapapa	1673.88	0.338358	6.58242	0.124517
ABprappaa<->ABpraapppp	2246.38	0.438259	6.57143	0.152496
ABalaapa<->ABaraaapa	3327	0.00260463	6.56044	0.159091
ABprpapaap<->ABprppaapa	1073.27	0.0400943	6.51648	0.103686
MSa<->ABalpa	11064	0.200032	6.48352	0.153012
MSa<->ABalpp	8614.73	0.284717	6.48352	0.119316
MSppaa<->MSpaaap	1956.83	0.301738	6.46154	0.105916
ABalpapaa<->ABalpappaa	2222.45	0.0195775	6.42857	0.139208
MSa<->ABplpa	8524.79	0.363724	6.40659	0.118196
ABpraaapa<->ABpraaappa	1661.8	0.119585	6.40659	0.107963
MSa<->ABaraa	8465.21	0.0781726	6.3956	0.118121
ABar<->MS	13880.6	0.701307	6.3956	0.10317
MSaapp<->MSpapap	3541.28	0.0357611	6.37363	0.18743
MSp<->ABprpa	11679.9	8.7e-05	6.34066	0.161719
Eplap<->Caaaaa	1381.51	0.245889	6.32967	0.130112
Da<->MSappp	4269.06	0.16023	6.30769	0.154403
ABpr<->E	11301	0.661416	6.28571	0.0808524
Caap<->Caaap	5440.43	0.00388058	6.21978	0.234675
MSpppp<->MSppapp	2568.43	8.25e-07	6.1978	0.141774
ABarppap<->ABplapapa	2998.44	0.763733	6.1978	0.135163
ABprpp<->Cpp	6974.2	0.000877531	6.15385	0.112506
MSpapp<->MSpapap	4504.98	0.632981	6.14286	0.236825
Cppa<->Cpppp	4535.4	0.84968	6.12088	0.235655
ABplpp<->Cap	10086	0.000931225	6.12088	0.15954
MSpa<->ABaraap	5349.52	4.63e-05	6.06593	0.114027
Ea<->Ca	3042.45	0.352503	6.02198	0.0774112
ABaraaaa<->ABaraaapa	3174.91	0.70466	6.02198	0.148369
ABplppaa<->ABplpaapp	3301.4	1.61e-06	5.94505	0.156824
ABprp<->Ep	8169.6	0.0785256	5.92308	0.0920815
D<->ABprppp	7134.65	0.00769503	5.87912	0.152656
ABalaaaal<->ABalpaappa	1974.44	0.190649	5.86813	0.1515
MSpapap<->MSpapaap	2242.38	0.911414	5.83516	0.161366
ABalppaa<->ABalpaapp	2052.02	6.33e-05	5.79121	0.107714
ABalpppap<->ABalpppppa	2104.92	0.140153	5.78022	0.127387
ABarppaa<->ABarpaapp	4998.2	0.000283782	5.67033	0.22281
MSaa<->ABalaap	5685.51	0.000597997	5.59341	0.123201
ABprppaa<->ABprpaapp	3376.5	0.520093	5.58242	0.161509
C<->ABplp	8978.02	0.022586	5.56044	0.0905059
ABplppapa<->ABplpaappp	2110.43	0.00150131	5.52747	0.143309
Capa<->Cappp	3939.66	0.605712	5.50549	0.210653
ABalpapap<->ABalpappap	1976.68	0.309305	5.48352	0.122032
ABalpaaa<->ABalpaapa	2300.55	0.015574	5.43956	0.108975
ABpr<->C	30842.5	0.346993	5.42857	0.207958
ABalppaa<->ABalppapa	2565.11	0.728639	5.40659	0.124372
ABprapaaa<->ABpraapppa	2080.08	0.115901	5.36264	0.140332
ABplpapaa<->ABalppappp	2347.1	0.0461774	5.30769	0.154459
ABpraappa<->ABpraapppa	2282.86	0.851243	5.24176	0.150588
ABplpapap<->ABplpappaa	1851.12	0.000634351	5.23077	0.11656
ABpraapap<->ABpraaappp	2322.35	0.645664	5.17582	0.146796
ABprppaa<->ABprpapap	2340.62	0.441842	5.17582	0.117697
ABprap<->Cpa	10668.7	0.00211046	5.12088	0.164242
ABplap<->Caa	11136.1	0.29271	5.03297	0.170973
MSaaa<->ABalaapa	3193.59	0.00297954	4.73626	0.106504
P3<->Cp	15442.4	0.0364159	4.71429	0.159566
ABaraaaa<->ABaraapaa	2403.2	0.00129638	4.71429	0.1162
ABprp<->Cp	9678.73	0.0171124	4.7033	0.101673
ABplp<->Ca	11910.2	0.00311386	4.65934	0.122196
MSpaap<->MSpapaa	2219.07	0.432038	4.61538	0.118738
ABarppp<->Caaa	5255.71	0.000275846	4.6044	0.137026
ABalppppa<->ABalpppppa	1760.62	0.453741	4.56044	0.105455
ABarp<->Ca	14731.9	0.000816342	4.52747	0.151107
ABpra<->Cp	12260.8	0.489696	4.50549	0.126439
MSpaap<->MSpaaap	2006.01	0.668462	4.47253	0.106594
ABpr<->P2	28593.6	0.869084	4.45055	0.167025
Ep<->ABprpap	4917.39	0.179602	4.43956	0.10402
E<->ABprp	14712.6	0.663285	4.42857	0.12845
ABprappp<->ABprapapp	3250.83	0.477896	4.42857	0.150077
E<->ABplp	17845.2	0.0353831	4.40659	0.155902
MSap<->Eal	5695.79	0.0750617	4.17582	0.126163
Cap<->Cpap	4508.46	0.37121	4.15385	0.111896
ABpl<->P2	12847	0.227896	4.03297	0.0763058
ABplappa<->ABplaappp	3867.69	0.379051	4.01099	0.158067
ABalaapa<->ABalaaapp	2415.22	0.0272549	3.98901	0.121062
Daa<->Dapa	3119.75	0.0191506	3.95604	0.175859
ABalaaaa<->ABalaaapa	3280.9	0.280409	3.92308	0.160944
ABalaapa<->ABalaappa	2563.31	0.788965	3.89011	0.129598
Ea<->ABplapp	6430.77	0.0067648	3.89011	0.132266
Dpa<->Dppa	2627.12	0.902416	3.82418	0.149629
MS<->ABplp	19964.3	0.780244	3.81319	0.172931
MS<->ABara	12462	0.796361	3.8022	0.107697
MS<->ABprp	10554.7	0.821989	3.76923	0.0921082
MS<->ABalp	15344.6	0.893221	3.76923	0.133204
MSaaaap<->MSaaaaap	1445.93	0.46486	3.73626	0.102752
ABprappa<->ABprapapp	3169.99	0.871358	3.58242	0.139494
Cap<->Caap	5993.91	0.104322	3.58242	0.150455
ABprappa<->ABprapapa	2720.68	0.669488	3.49451	0.119347
ABpraaaa<->ABpraaapa	3041.89	0.372401	3.45055	0.142095
ABprapaa<->ABprapapa	3716.54	0.968735	3.17582	0.160066
ABprpppaa<->ABprppppap	2139.72	0.231256	3.10989	0.144256
ABarapaa<->ABarapapa	3593.44	0.00993546	2.92308	0.152833
ABprpppaa<->ABprppppaa	1899.35	0.633938	2.89011	0.13046
MSppp<->MSpapp	4723.44	0.855642	2.64835	0.162082
ABalpapa<->ABalpappa	4498.56	0.530985	2.43956	0.179347
EMS<->P2	34105.8	0.073624	2.41758	0.189151
ABal<->EMS	28553.2	0.0287715	2.31868	0.159388
ABpl<->EMS	19055	0.0434413	2.30769	0.106067
P2<->E	34379.6	2.24e-08	2.14286	0.211088
* p=1 meaning perfect normal distribution. P<0.05 meaning a failure in satisfying normality test
